# Supplementary material for: Consensus on the histopathological evaluation of liver biopsies from patients following allogeneic hematopoietic cell transplantation
Source: Springer Nature journal article supplement (doi:10.1007/s00428-013-1528-8), 2014-01-02
Supplement: MOESM1 [file 428_2013_1528_MOESM1_ESM.doc]

**Supplementary Material**

**Participants in the Liver Pathology Group**

1. Pathologists participating in the Liver Pathology Group of the German-Austrian-Swiss Working Group on GvHD:

Hideo A. Baba, Essen, Germany

Alexander Bogumil, Mainz, Germany

Falko Fend, Tübingen, Germany

Birgit Federmann, Tübingen, Germany

Hans-Peter Fischer, Bonn, Germany

Michael Hainz, Mainz, Germany

Elisabeth Huber, Regensburg, Germany

Thomas Longerich, Heidelberg, Germany

Annette Schmitt-Graeff, Freiburg, Germany

Howard M. Shulman, Seattle, USA

Judith Stift, Vienna, Austria

Fritz Wrba, Vienna, Austria

1. Haemato-oncologists supervising the Liver Pathology Group of the German-Austrian-Swiss Working Group on GvHD:

Herrad Baurmann, Wiesbaden, Germany

Hartmut Bertz, Freiburg, Germany

Rainer Schwerdtfeger, Wiesbaden, Germany

**Supplementary Table 1** Acceptance of the present recommendations as evaluated by a survey distributed among alloHCT centers in Austria, Germany, and Switzerland(recommendations only addressing pathologists are shaded in grey)

| **Recommendation** | **Number in Agreement** | **Number in Disagreement** |
| --- | --- | --- |
| Liver biopsy should be limited to those patients, for which the expected histological and/or microbiological findings are expected to have potential consequences for the therapeutic management. | 23 | 0 |
| Liver biopsy is not required, if clinical symptoms are compatible with GVHD (especially if other organ manifestations are apparent) and respond to therapy. | 23 | 0 |
| If the bleeding risk is acceptable, a liver biopsy is indicated in alloHCT patients with abnormal liver function which do not respond to seemingly adequate treatment and after non-invasive diagnostic steps have failed to establish a definitive diagnosis. | 18 | 4 |
| Liver biopsy should be performed by physicians highly experienced in percutaneous, laparoscopic and/or transjugular techniques, respectively. The method of choice depends on medical reasons and on specifically skilled personal. | 23 | 0 |
| Percutaneous liver biopsies should be obtained according to Menghini´s technique using the widest gauge of a needle compatible with the local clinical practice and safety. | 22 | 0 |
| A biopsy cylinder (preferentially 14-16 gauge) of 1.5 to 2 cm will usually contain 10 portal tracts and is considered representative for histopathological evaluation. | 21 | 0 |
| For diagnostic evaluation of hepatic GVHD an H&E, a connective tissue stain, iron stain, and Periodic Acid–Schiff with/without diastase digestion, as well as a reticulin stain and an immunostain to highlight bile ducts (e.g. CK7 or 19) are recommended. | 20 | 4 |
| The application of additional histochemical or immunohistochemical analyses as well as molecular pathological analyses should depend on the histological findings and the diagnostic question. | 21 | 0 |
| The structured pathology report should include the clinical and laboratory information relevant for biopsy interpretation and detail whether the given specimen is adequate for histological evaluation. | 20 | 1 |
| Histological evaluation of a liver core cylinder requires systematic evaluation of the portal tracts, the acinar parenchyma, the central veins, and the liver architecture. | 21 | 0 |
| The reporting of the histological findings should result in a descriptive diagnosis that in combination with the clinical and laboratory information leads to a final interpretation including a statement on the certainty of GVHD. If present, the amount of bile duct loss should be given as % of informative portal tracts. | 19 | 2 |
| The histological features of GVHD are neither pathognomonic nor entirely specific. | 21 | 0 |
| The differential diagnosis of GvHD mainly includes drug-induced liver damage, infections, co-acting factors, and concurrent biliary diseases. | 21 | 0 |
| The detailed evaluation of differential diagnoses and/or additional pathologies is essential for the assessment of liver biopsies in the setting of HCT and biopsy interpretation requires the integration of clinical and laboratory information. | 21 | 0 |
| Histopathologcial grading and staging of GvHD is not recommended at present. | 19 | 2 |
